# Supplementary material for: RNA-seq of 272 gliomas revealed a novel, recurrent PTPRZ1-MET fusion transcript in secondary glioblastomas
Source: HighWire-hosted journal article supplement (doi:10.1101/gr.165126.113), 2014-08-18
Supplement: Supporting_Materials.docx [file Supporting_Materials.docx]

**Supplemental Materials**

**RNA-seq library preparation**

Total RNA was isolated using RNeasy Mini Kit (Qiagen) according to the manufacture’s instructions. Pestle and QIAshredder (Qiagen) were used to disrupt and homogenize frozen tissue. RNA intensity was checked using 2100 Bioanalyzer (Agilent Technologies) and only high quality sample with RNA Integrity Number (RIN) value greater than or equal to 7.0 was used to construct sequencing library. Typically, 1μg of total RNA was used with TruSeq RNA library preparation kit (Illumina) in accordance with low-throughput protocol, except that SuperScript III reverse transcriptase (Invitrogen) was used to synthesize first strand cDNA. After PCR enrichment and purification of adapter-ligated fragment, concentration of DNA with adapters was determined with quantitative PCR (Applied Biosystems 7500) using primer QP1 5’-AATGATACGGCGACCACCGA-3’ and QP2 5’-CAAGCAGAAGACGGCATACGAGA-3’. The length of DNA fragment was measured using 2100 Bioanalyzer, with median insert sizes of 200 nucleotides.

**DNA extraction and PCR validation**

DNA was extracted from frozen tissue using DNeasy Blood & Tissue Kit (Qiagen) according to the manufacturer’s instructions. To determine the breakpoint sequences at genome level, primers were designed at 5kb interval along introns. PCR were performed on genomic DNA using Phusion DNA polymerase (New England Biolabs). PCR products were purified using QIAquick PCR purification kit (Qiagen), followed by sanger sequencing.

**Cell culture and western blotting**

U87 cell line was cultured with DMEM (Gibco) supplemented with 10% fetal calf serum (Gibco). U87 cell line was respectively infected by adenovirus carrying PM sequence, c-MET sequence and scrambled sequence, and the cells were washed twice with cold 1× PBS, and whole-cell lysates was prepared using RIPA buffer. Equal amounts of total protein (30 μg) from cell lysates were loaded on a 10% SDS/PAGE gel, transferred to a PVDF membrane (Millipore), incubated with primary antibodies and washed in TBST, then incubated with second antibodies and washed. ECL signaling were detected and recorded by Western Blotting Detection System (Biorad). Antibodies of phospho-AKT (Cell Signaling Technology), phospho-ERK1/2 (Cell Signaling Technology), phospho-STAT3 (Cell Signaling Technology), His-tag and β-actin (Applygen Technologies) were used for western blotting. Goat anti-rabbit IgG-HRP and goat anti-mouse IgG-HRP (Zhongshan Gold Bridge Biotechnology) were used as secondary antibodies.

HEK293T cell was cultured with DMEM (Gibco) medium supplemented with 10% FBS (Hyclone) at 37°C in a CO2 incubator. Cells were seeded in 6-well plate and allowed to grow overnight. Full-length ZM fusion genes were cloned into 3xFLAG-CMV14 vector (Sigma). Different constructs were transfected into HEK293T cell using GenEscort (wisegen). 24 hrs after transfection, cell lysates were prepared in RIPA buffer with protease inhibitor cocktail (Sigma). Anti-FLAG antibody (Sigma) was used to detect ZM fusion protein expressed with C-terminal FLAG tag from whole cell lysates.

**Cell invasion assay**

The assay utilized was a transwell migration assay, where cell migration through a cell permeable membrane coated with matrigel *in vitro* was scored. This assay scores for cell migration through Matrigel *in vitro*. For invasion assays, the transwells (8 μm pore size; Corning) were coated with metrigel (BD Biosciences). Cells were plated in upper chamber in duplicate in medium containing 1% serum. 10% serum containing medium was placed in the bottom well and cells were allowed to invade for 24 h at 37°C. Photos from random fields of three independent experiments were taken.

**Supplemental Figrue Legends**

**Supplemental Figure 1. Fusion characteristics in 272 all grades of gliomas.** A, summary of clinical pathological characteristics (age, grade, sex, IDH1 mutation) and in-frame fusion genes identified in 272 samples by RNA-seq. B, summary of fusions with oncogenic annotation. C, genomic organization for in-frame FGFR3-TACC3 gene fusions in three cases. D, genomic organization for an in-frame RNF213-SLC26A11 gene fusion in two cases. Fusion breakpoints occurred the same in two samples. E, genomic organization for PTPRZ1-MET (ZM) fusion in four cases.

**Supplemental Figure 2. fusion pattern of ZM fusion in DNA and RNA level.** A, CGGA_D64 harbored a ZM fusion that fused exon 8 of PTPRZ to exon 2 of MET. B, PCR amplification and Sanger sequencing of the genomic breakpoint in CGGA_D64 revealed a translocation fusing DNA sequences from intron 8 of *PTPRZ1* and intron 1 of *MET* . C, CGGA_1068 harbored a RNA transcript fusing exon 2 of PTPRZ to exon 2 of MET. D, Sanger sequencing of the genomic breakpoint in CGGA_1068 revealed a translocation fusing DNA sequences from intron 1 of *PTPRZ1* and intron 1 of *MET.* E. splicing of this fused intron results in the expected RNA fusion pattern.

**Supplemental Figure 3.** Flag tagged version of the CGGA_1475 and CGGA D64 ZM fusion was cloned into an vector and stably expressed this protein in the 293T cells.
